# Supplementary material
Source: Springer Nature journal article supplement (https://www.springermedizin.de/resource/supplementary/12939_2013_400_MOESM1_ESM.pdf/9551090)
Supplement: MOESM1 [file 9551090]

Table 1: Comparing those in a relationship to those not in a relationship

|                                                    | <b>Currently in relationship</b> | <b>Currently <i>not</i> in relationship</b> |
|----------------------------------------------------|----------------------------------|---------------------------------------------|
|                                                    | n=15                             | n=12                                        |
| <b>Age</b>                                         | 30.4                             | 26.17                                       |
| <b>Years in Nairobi</b>                            | 14.6                             | 16.75                                       |
| <b>Income (Kenyan Shillings)</b>                   | 1960                             | 2690                                        |
| <b>Children in household</b>                       | 3.1                              | 4.7                                         |
| <b>Marital status</b>                              |                                  |                                             |
| <i>Single never married</i>                        | 9                                | 7                                           |
| <i>Divorced separated</i>                          | 3                                | 2                                           |
| <i>Widowed</i>                                     | 3                                | 3                                           |
| <b>Education</b>                                   |                                  |                                             |
| <i>None</i>                                        | 2                                | 1                                           |
| <i>Primary</i>                                     | 6                                | 5                                           |
| <i>Secondary/A-level</i>                           | 6                                | 6                                           |
| <i>College/ mid-level</i>                          | 1                                | 0                                           |
| <b>Years in sex work</b>                           | 6.34                             | 6.11                                        |
| <b>Number of clients in average week</b>           | 6.6                              | 7.33                                        |
| <b>Number who tell clients that they are HIV+</b>  | 6                                | 5                                           |
| <b>Number who have told partner they are HIV+</b>  | 12                               | 6                                           |
| <b>Number who have told partner they are a FSW</b> | 7                                | 3                                           |
| <b>Number ever emotionally hurt by partner</b>     | 9                                | 10                                          |
| <b>Number ever physically hurt by partner</b>      | 5                                | 7                                           |
| <b>Number ever sexually hurt by partner</b>        | 3                                | 6                                           |
